# Supplementary material for: Loss of function of Arabidopsis microRNA-machinery genes impairs fertility, and has effects on homologous recombination and meiotic chromatin dynamics
Source: PubMed Central journal article supplement (PMC5571030; doi:10.1038/s41598-017-07702-x), 2017-08-24
Supplement: 41598_2017_7702_MOESM1_ESM.pdf [file 41598_2017_7702_MOESM1_ESM.pdf]

**Loss of function of Arabidopsis microRNA-machinery  
genes impairs fertility, and has effects on homologous  
recombination and meiotic chromatin dynamics**

Cecilia Oliver, Mónica Pradillo, Sara Jover-Gil, Nieves Cuñado,  
María Rosa Ponce and Juan Luis Santos

Supplementary Information

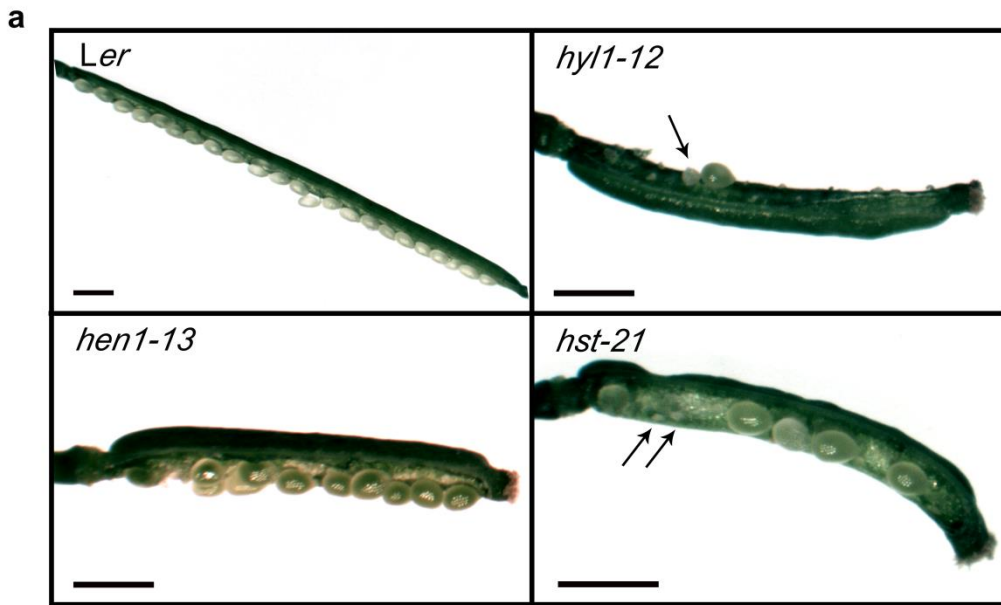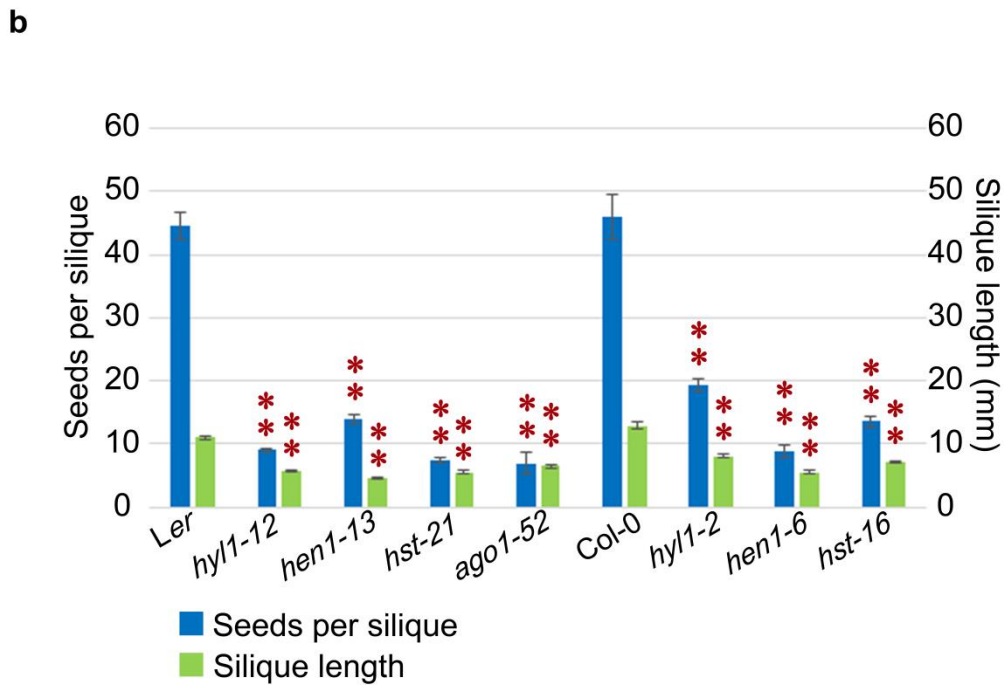

**Supplementary Figure S1. Fertility in the *hyl1*, *hen1*, *hst* and *ago1* mutants. (a)** Siliques from *Ler*, *hyl1-12*, *hen1-13* and *hst-21*. Arrows point to aborted seeds. Scale bars: 1 mm. **(b)** Seeds per silique and silique length. Error bars indicate standard error of the mean. Asterisks indicate a significant difference with the corresponding WT in a Mann-Whitney U test (\*\*p < 0.01).

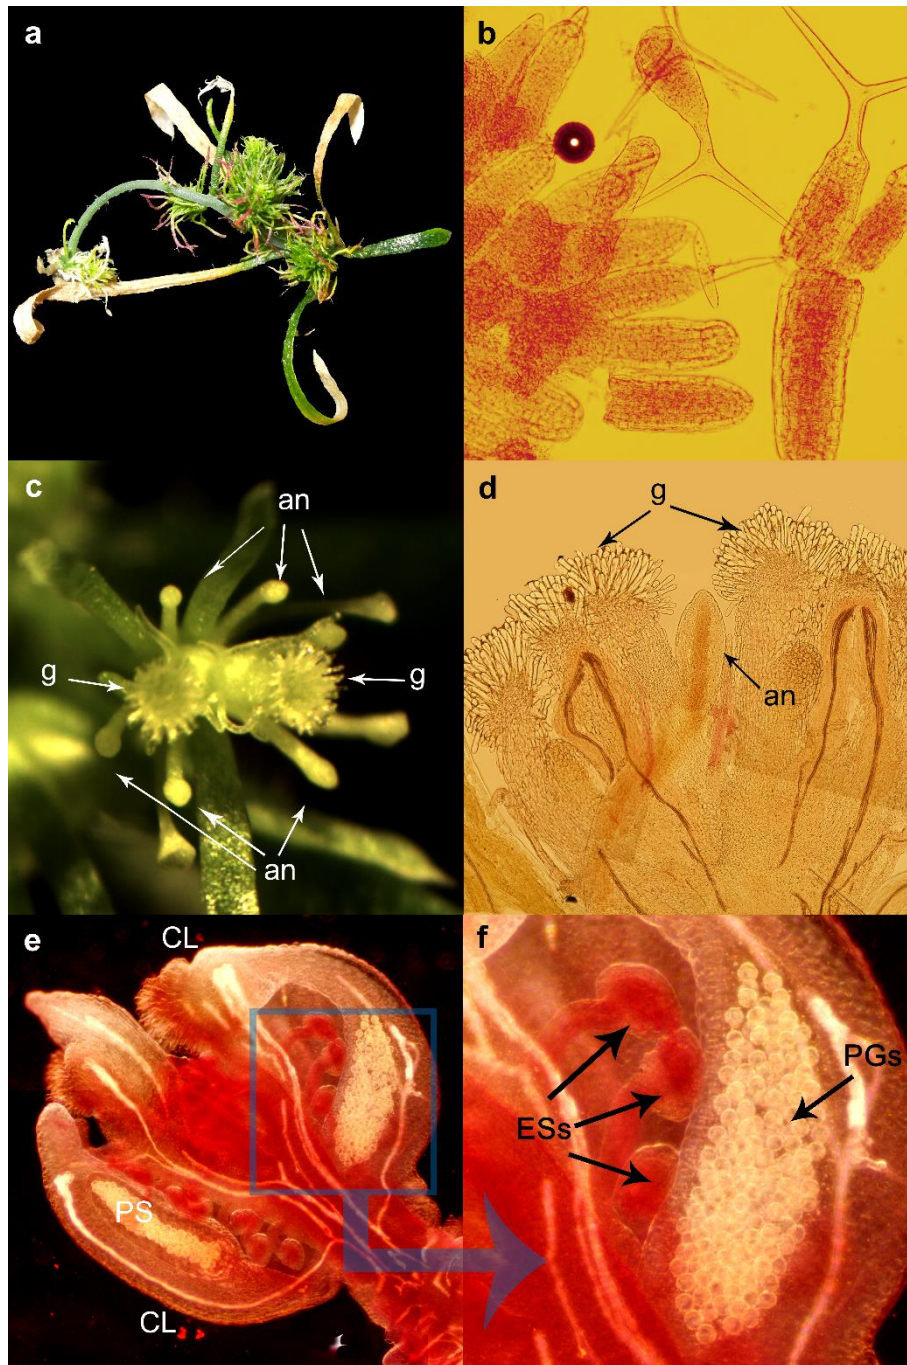

**Supplementary Figure S2. Flower organ aberrations in *ago1-101* and *dcl1-9*.** (a) *ago1-101* inflorescences formed by filamentous structures. (b) Detail of one of the filamentous structures shown in (a), stained with acetic carmine. (c) *ago1-101* flower displaying two gynoecia (g) and six anthers (an). (d) Acetic carmine staining of the flower shown in (b). (e) Acetic carmine staining of a *dcl1-9* gynoecium. (f) Magnification of (e), showing details of a pollen sac (PS) with pollen grains (PGs) within the carpel leaf (CL) and adjacent to the embryo sacs (ESs).

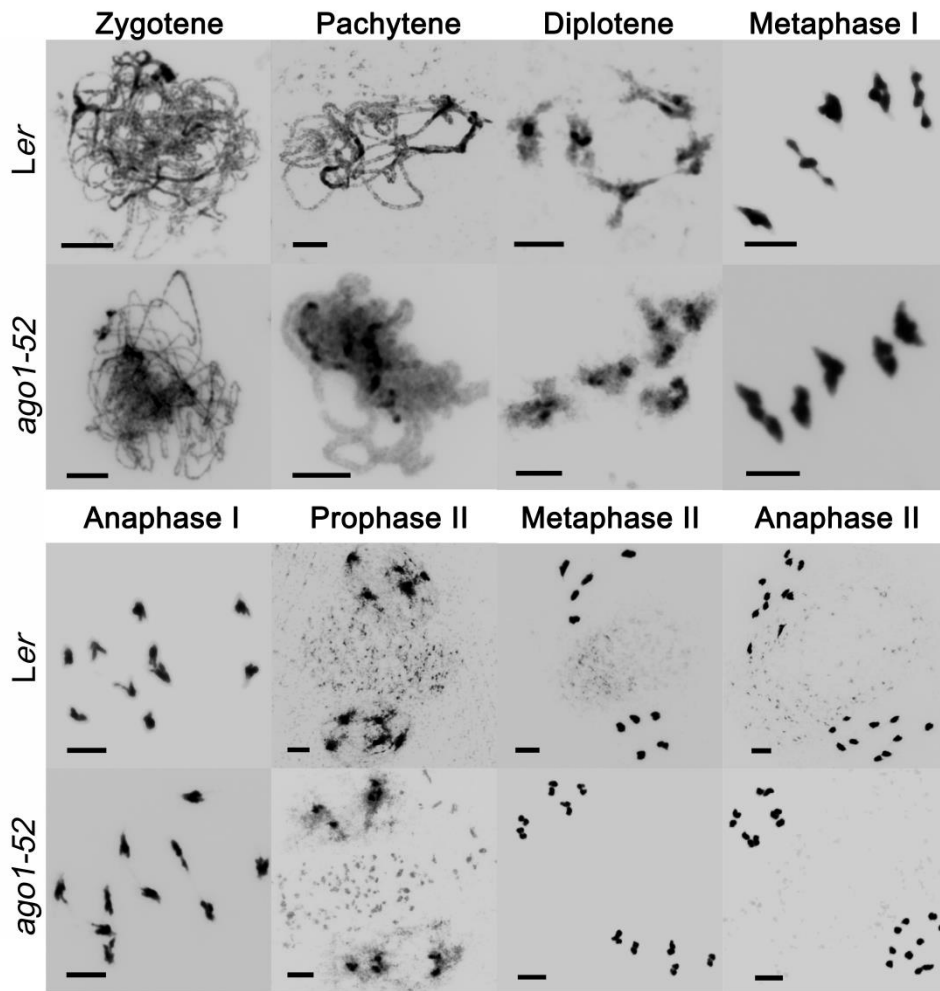

**Supplementary Figure S3. Meiotic stages in PMCs from Ler and *ago1-52*.** Bars = 5  $\mu$ m.

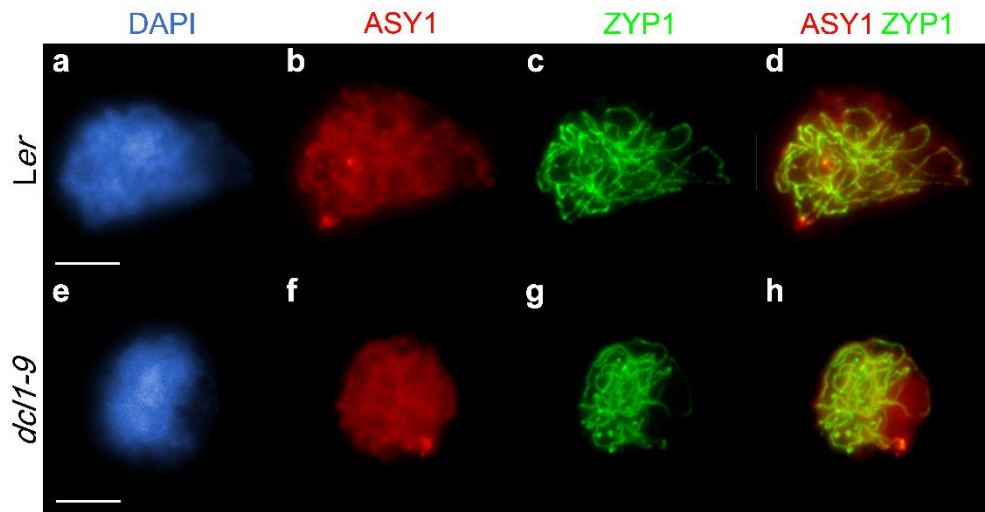

**Supplementary Figure S4. ASY1 and ZYP1 immunolocalization in *Ler* and *dcl1-9* meiocytes.** (a-d) *Ler* late pachytene. (e-h) *dcl1-9* late pachytene. Similar results were obtained with other mutants studied. Blue, red and green signals correspond to DAPI, ASY1 and ZYP1, respectively. Bars = 5 μm.

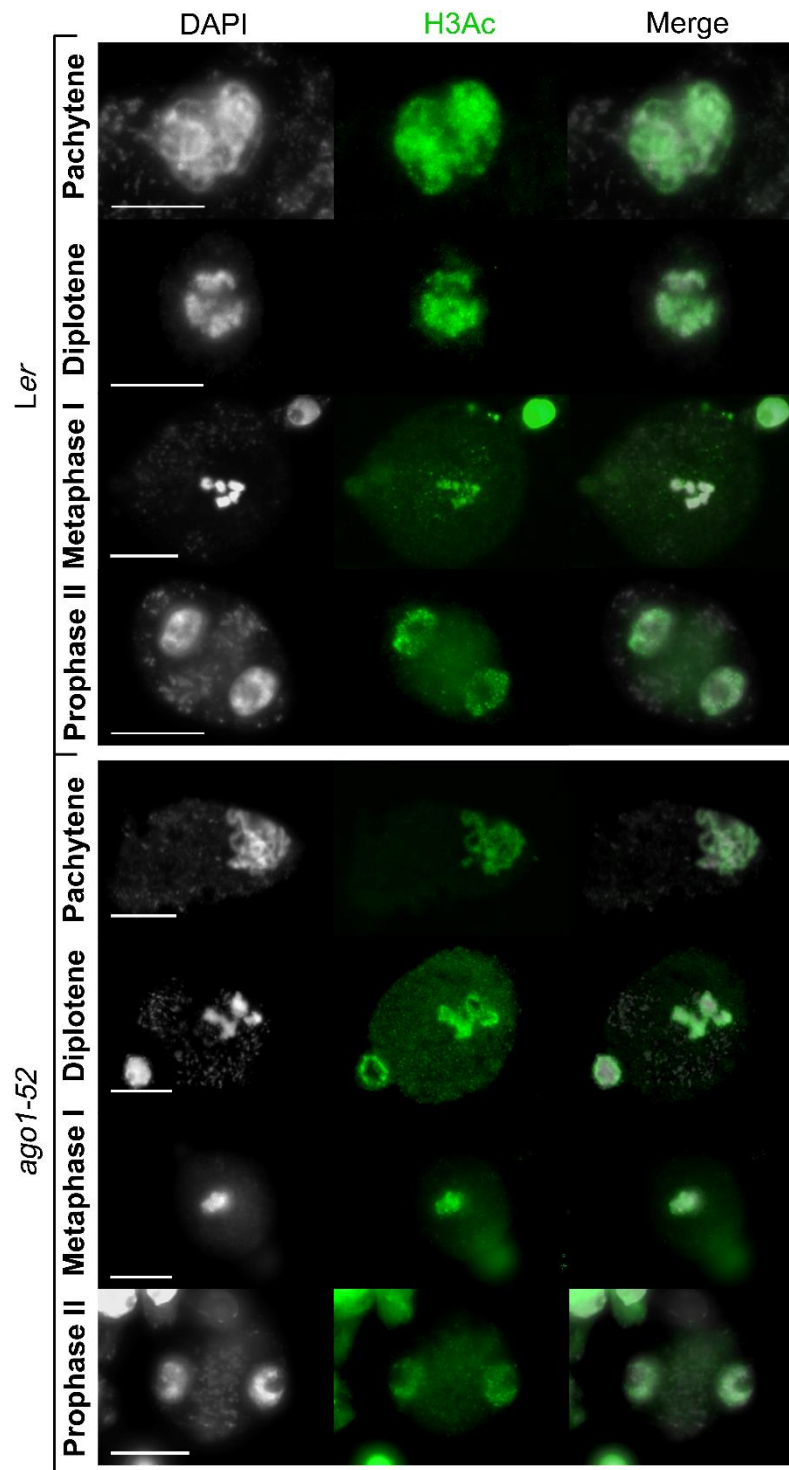

**Supplementary Figure S5. Distribution pattern of H3Ac in PMCs from *Ler* and *ago1-52*.** Representative images of H3Ac immunolocalization, which marks euchromatin regions. Similar results were obtained with other mutants studied. Bars = 5  $\mu$ m.

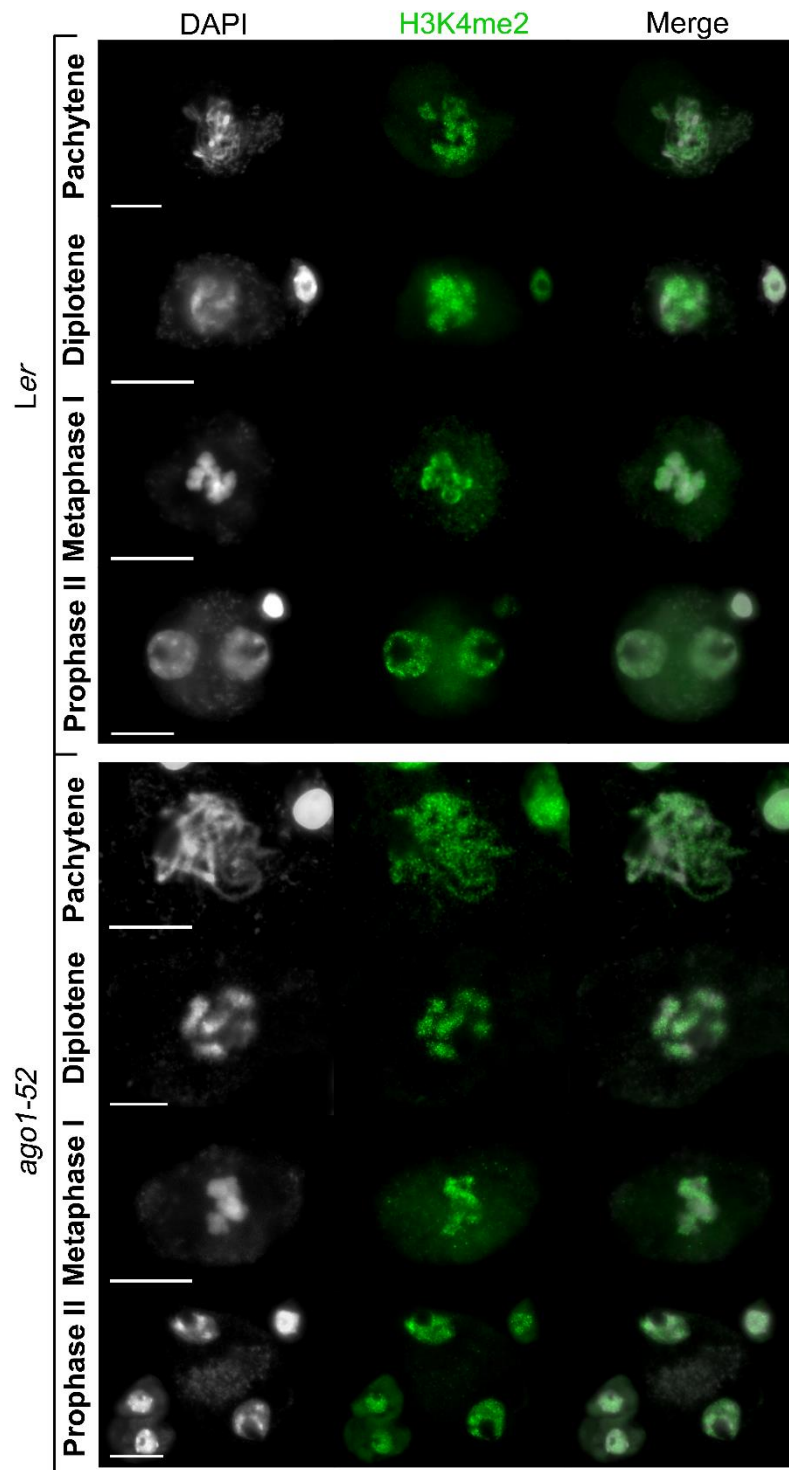

**Supplementary Figure S6. Distribution pattern of H3K4me2 in PMCs from *Ler* and *ago1-52*.** Representative images of H3K4me2 immunolocalization, which marks euchromatin regions. Similar results were obtained with other mutants studied. Bars = 5  $\mu$ m.

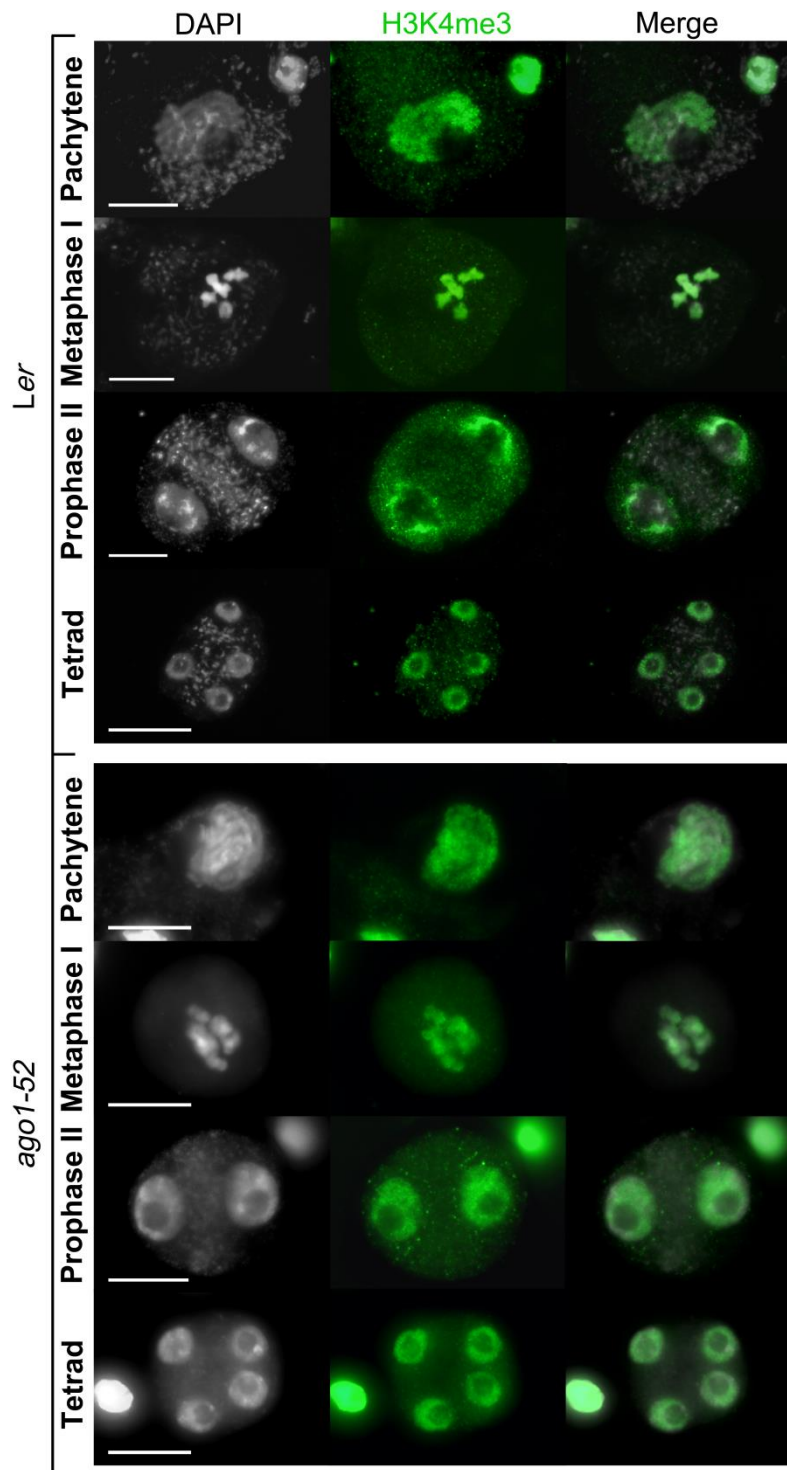

**Supplementary Figure S7. Distribution pattern of H3K4me3 in PMCs from *Ler* and *ago1-52*.** Representative images of H3K4me3 immunolocalization, which marks euchromatin regions. Similar results were obtained with other mutants studied. Bars = 5  $\mu$ m.



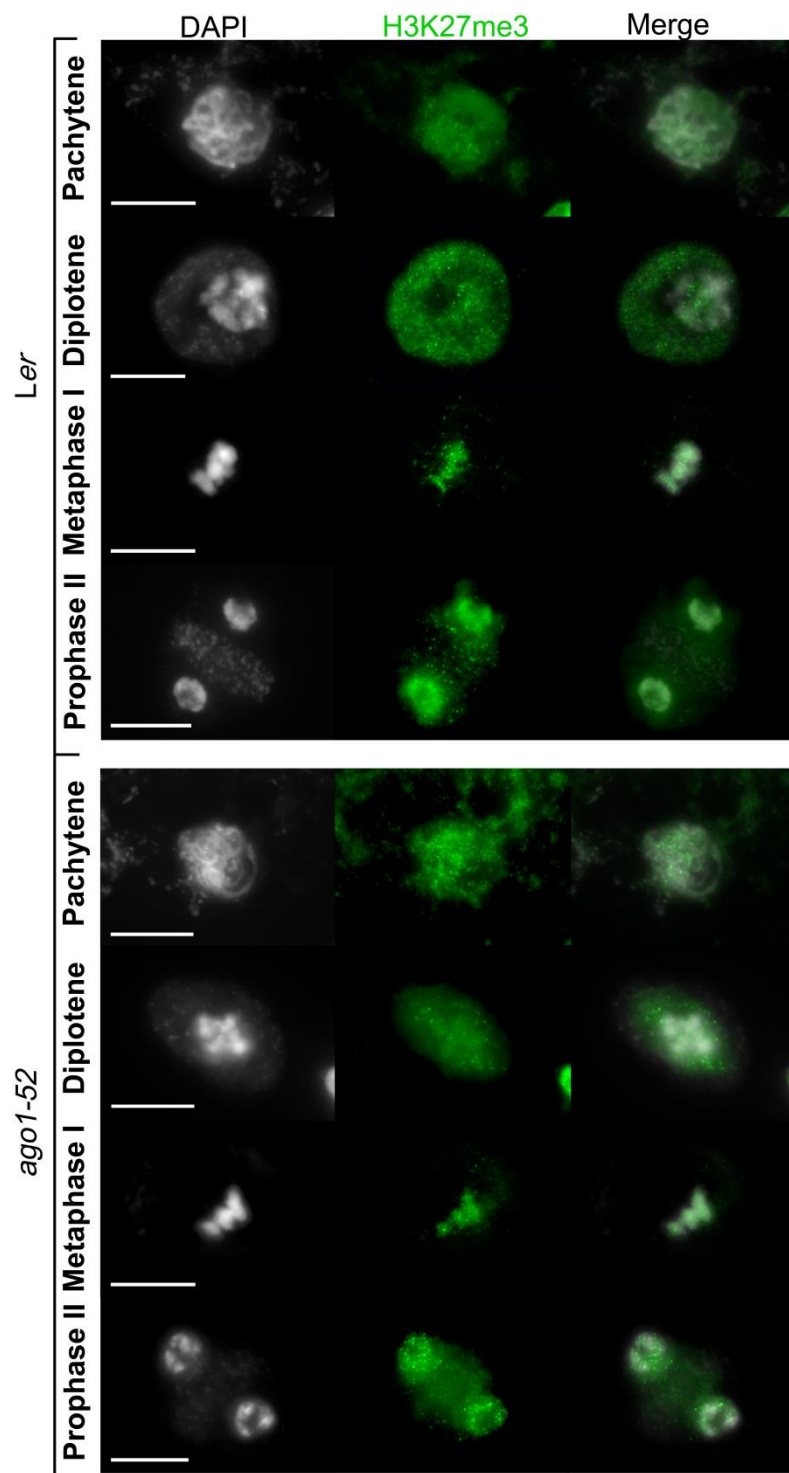

**Supplementary Figure S8. Distribution pattern of H3K27me3 in PMCs from *Ler* and *ago1-52*.** Representative images of H3K27me3 immunolocalization, which marks euchromatin regions. Similar results were obtained with other mutants studied. Bars = 5  $\mu$ m.

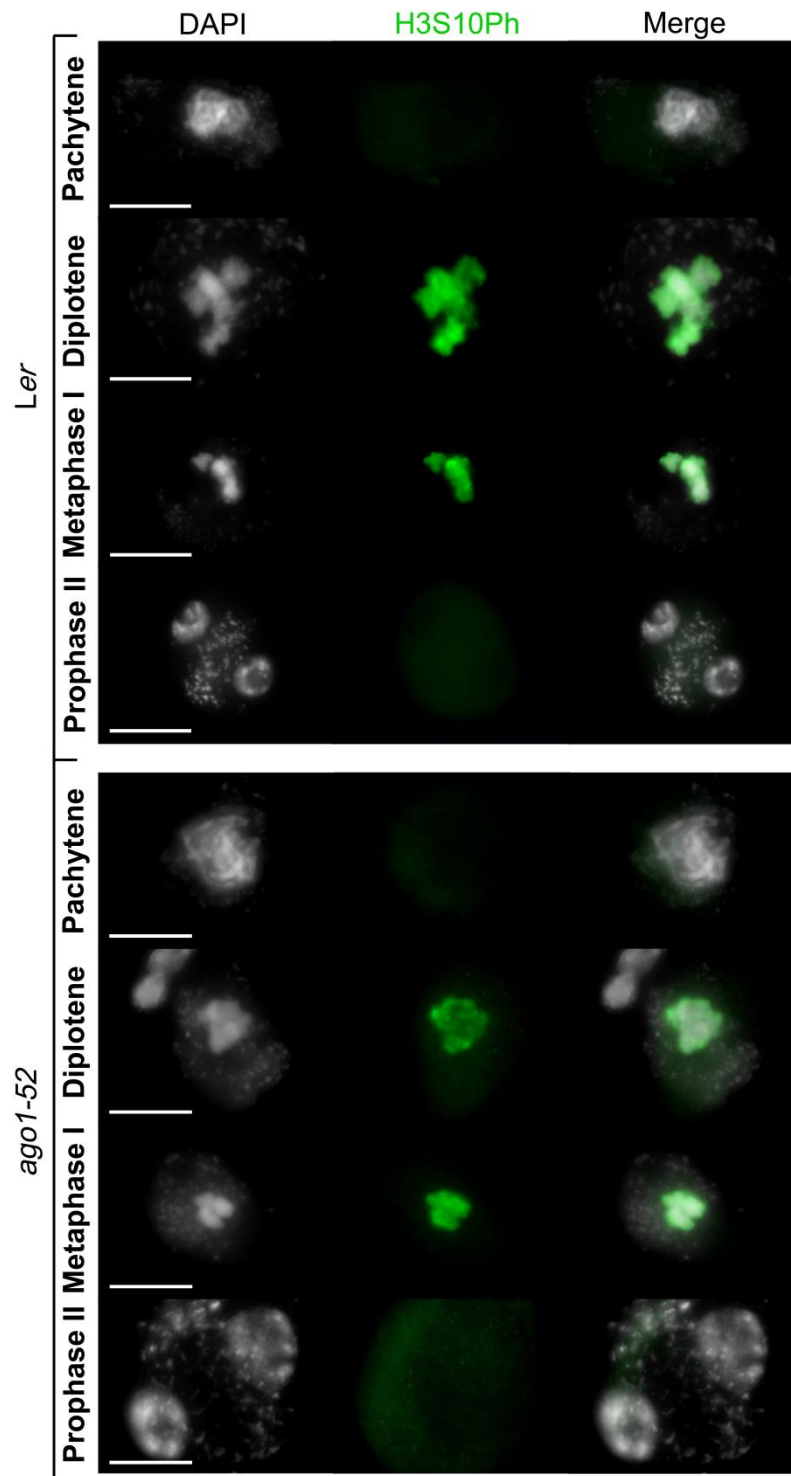

**Supplementary Figure S9. Distribution pattern of H3S10Ph in PMCs from *Ler* and *ago1-52*.** Representative images of H3S10Ph immunolocalization, which marks condensed chromosomes. Similar results were obtained with other mutants studied. Bars = 5  $\mu$ m.

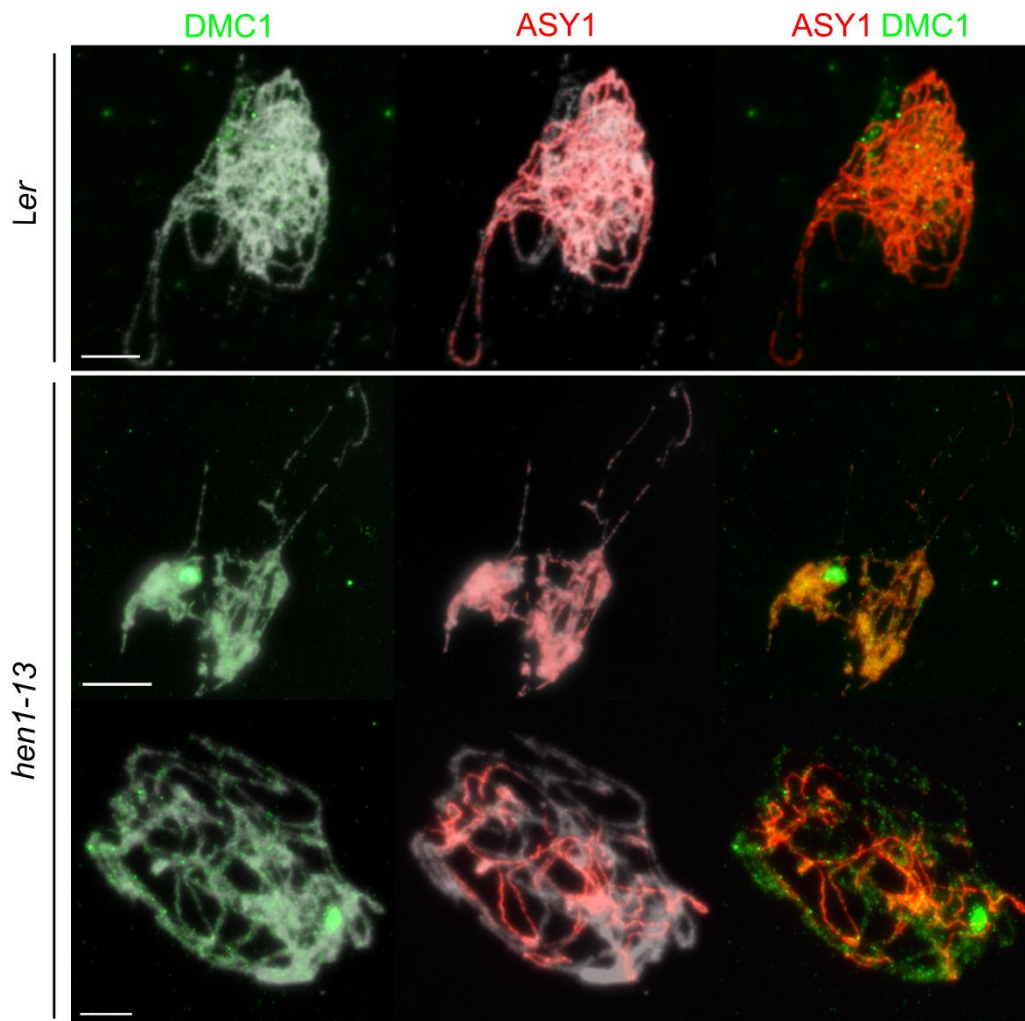

**Supplementary Figure S10. DMC1 and ASY1 immunolocalization in *Ler* and *hen1-13* meiocytes. (a-c) *Ler*. (d-i) *hen1-13*. Green and red signals correspond to DMC1 and ASY1, respectively. Bars = 5  $\mu$ m.**

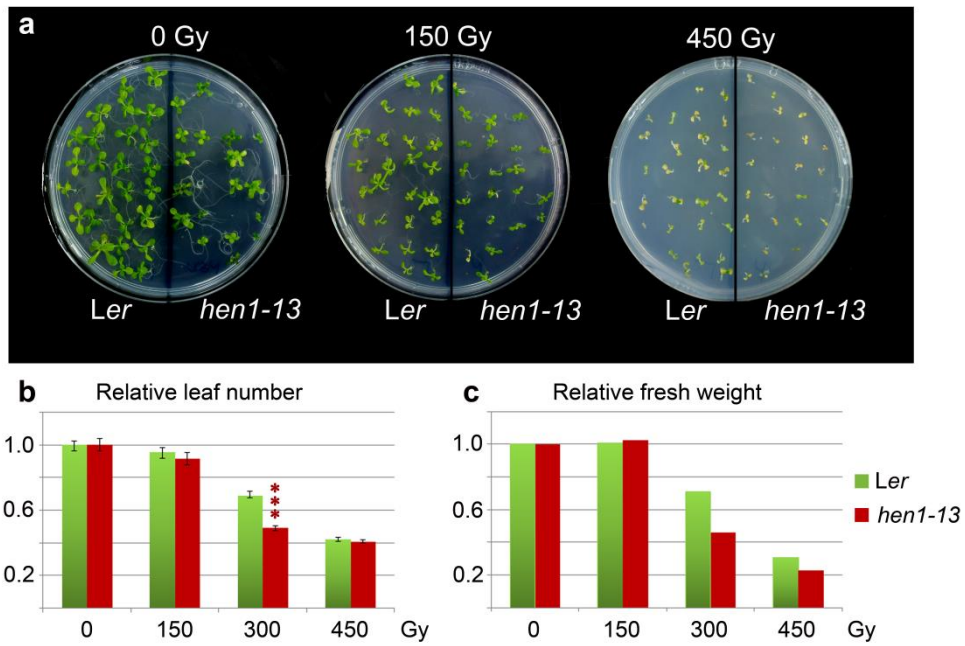

**Supplementary Figure S11. Sensitivity to gamma rays in *Ler* and *hen1-13*.** (a) Representative images of plants exposed to 0, 150 and 450 Gy. (b) Relative leaf number after different doses of gamma irradiation. Leaf number was quantified in both genotypes and calculated in relation to the untreated control plants. Error bars indicate standard error of the mean. Asterisks indicate values significantly different from the corresponding wild type in a Mann-Whitney U test ( $***p < 10^{-3}$ ). (c) Relative fresh weight after different doses of gamma irradiation. Fresh weight was measured in both genotypes and calculated in relation to the untreated control plants.

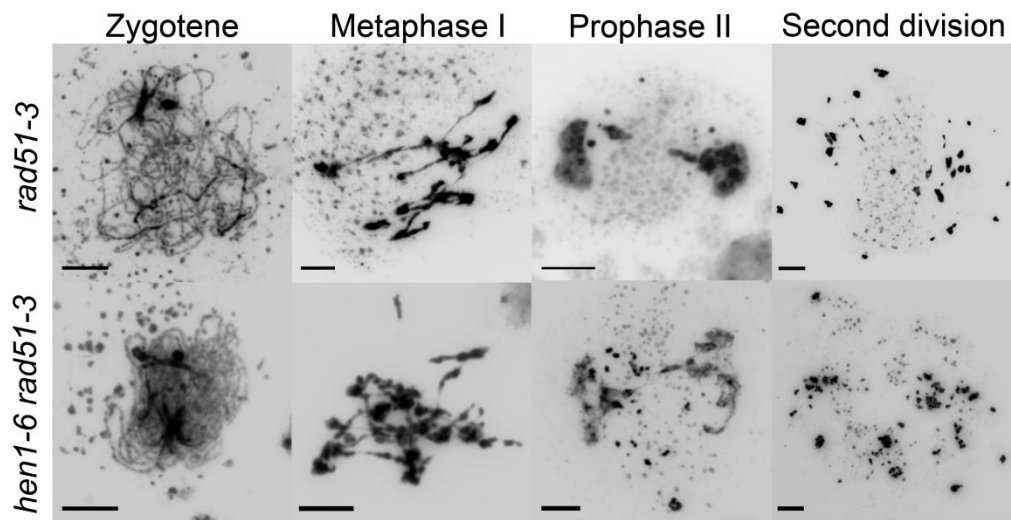

Supplementary Figure S12. PMCs from *rad51-3* and *hen1-6 rad51-3*. Bars = 5  $\mu$ m.

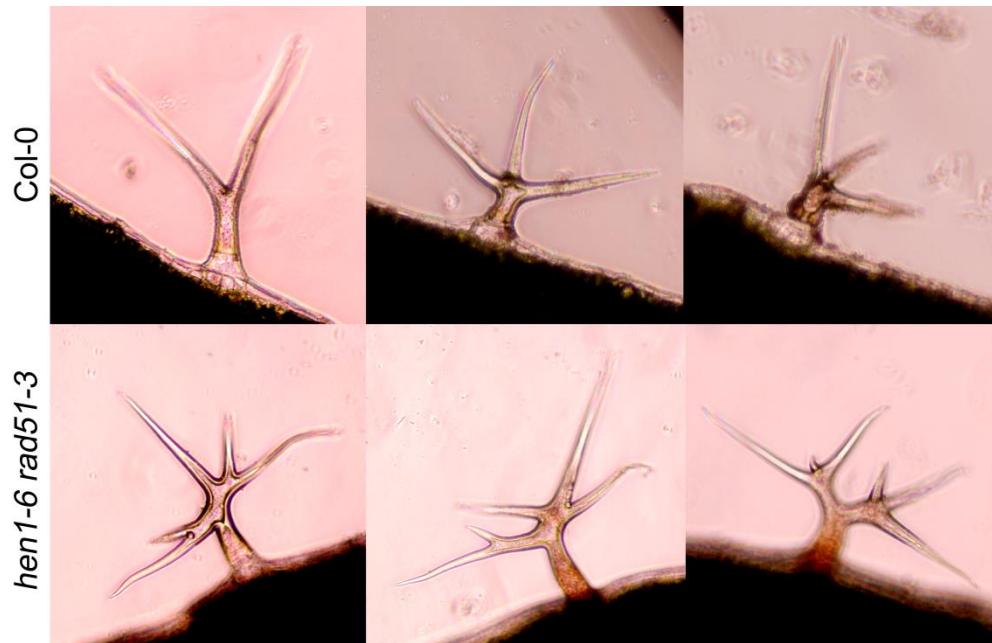

Supplementary Figure S13. Col-0 and *hen1-6 rad51-3* trichomes.

**Supplementary Table S1: Mutants studied in this work.**

| Gene                      | Allele                       | Mutagen      | Genetic background |
|---------------------------|------------------------------|--------------|--------------------|
| At1g01040 ( <i>DCL1</i> ) | <i>dcl1-9</i> <sup>1</sup>   | T-DNA        | <i>Ler</i>         |
|                           | <i>dcl1-16</i> <sup>6</sup>  | T-DNA        | Col-0              |
| At1g09700 ( <i>HYL1</i> ) | <i>hyl1-12</i> <sup>2</sup>  | Fast neutron | <i>Ler</i>         |
|                           | <i>hyl1-2</i> <sup>3</sup>   | T-DNA        | Col-0              |
| At4g20910 ( <i>HEN1</i> ) | <i>hen1-13</i> <sup>2</sup>  | Fast neutron | <i>Ler</i>         |
|                           | <i>hen1-6</i> <sup>3</sup>   | T-DNA        | Col-0              |
| At3g05040 ( <i>HST</i> )  | <i>hst-21</i> <sup>4</sup>   | EMS          | <i>Ler</i>         |
|                           | <i>hst-17</i> <sup>6</sup>   | T-DNA        | Col-0              |
| At1g48410 ( <i>AGO1</i> ) | <i>ago1-52</i> <sup>2</sup>  | EMS          | <i>Ler</i>         |
|                           | <i>ago1-101</i> <sup>5</sup> | T-DNA        | Col-0              |

<sup>1-5</sup>Supplemental References. <sup>6</sup>This work.

**Supplementary Table S2: Percentage of decondensed nuclei at prophase I and metaphase I in PMCs from *ago1*, *dcl1*, *hen1*, *hst* and *hyl1* mutants.**

| Meiotic stage | Mutant         | Decondensed nuclei (%) | Number of cells |
|---------------|----------------|------------------------|-----------------|
| Prophase I    | <i>ago1-52</i> | 37.74                  | 53              |
|               | <i>dcl1-9</i>  | 40.00                  | 20              |
|               | <i>hen1-13</i> | 41.46                  | 41              |
|               | <i>hst-21</i>  | 36.00                  | 25              |
|               | <i>hyl1-12</i> | 26.47                  | 34              |
|               | <i>hen1-6</i>  | 34.29                  | 35              |
|               | <i>hyl1-2</i>  | 40.00                  | 30              |
| Metaphase I   | <i>hen1-6</i>  | 12.50                  | 8               |
|               | <i>hst-17</i>  | 31.37                  | 51              |
|               | <i>hyl1-2</i>  | 20.83                  | 48              |





**Supplementary Table S4: Oligonucleotide sets used for genotyping.**

| Gene         | Line                          | Oligonucleotide sequences (5'→3') |                          |
|--------------|-------------------------------|-----------------------------------|--------------------------|
| <i>DCL1</i>  | <i>dcl1-16</i> (SALK_013118)  | GACTTTTGGGATTCTCGAAGG             | CCTCTCATCACTTTGCAAAGC    |
| <i>HYL1</i>  | <i>hyl1-2</i> (SALK_0064863)  | AGTTCTCCCAGCGCTAATCTC             | TTCTTGGAAATTGGATTGCAG    |
| <i>HEN1</i>  | <i>hen1-6</i> (SALK_090960)   | GCATACTCCTACTCCAAAGGCGA           | TGCCATCTTTCAATCCGAGCCT   |
| <i>HST</i>   | <i>hst-17</i> (SALK_033269)   | GCAAAGCATCTCTTCTGATGGTGG          | TGTCCATCACTGCTACATGCTGAG |
| <i>AGO1</i>  | <i>ago1-101</i> (SALK_035319) | GGCAATCCAGCCTATACCTTC             | TTCTCGATGAGTCACTTCAAC    |
| <i>RAD51</i> | <i>rad51-3</i> (SAIL_873_C08) | TCTCAAGAACTTTGCAAGATGC            | ATGCCAAGGTTGACAAGATTG    |

**Supplementary Table S5: Antibodies used for immunolocalization.**

| Antibody                   | Dilution | Obtained in |
|----------------------------|----------|-------------|
| anti-ASY1 <sup>1</sup>     | 1:1000   | Rat         |
| anti-ZYP1 <sup>1</sup>     | 1:250    | Rabbit      |
| anti-DMC1 <sup>1</sup>     | 1:300    | Rabbit      |
| anti-H3K9me2 <sup>2</sup>  | 1:200    | Rabbit      |
| anti-H3K4me2 <sup>3</sup>  | 1:200    | Rabbit      |
| anti-H3K4me3 <sup>3</sup>  | 1:200    | Rabbit      |
| anti-H3K27me3 <sup>2</sup> | 1:200    | Rabbit      |
| anti-H3Ac <sup>2</sup>     | 1:200    | Rabbit      |
| anti-H3S10Ph <sup>4</sup>  | 1:200    | Rabbit      |

<sup>1</sup>Kindly donated by Prof. Chris Franklin, University of Birmingham, UK; <sup>2</sup>Millipore; <sup>3</sup>Abcam; <sup>4</sup>Upstate.

**Supplementary Table S6: Oligonucleotide sets used for RT-qPCR.**

| Gene           |           | Oligonucleotide sequences (5'→3') |                            | UPL | Amplification product (bp) |
|----------------|-----------|-----------------------------------|----------------------------|-----|----------------------------|
| Symbol         | AGI code  | Forward primer                    | Reverse primer             |     |                            |
| <i>SYN1</i>    | At5g05490 | TCAGCAGACTTTTATTTCCATGC           | TCAGCTTGATGGAAGCTGCTG      | 129 | 93                         |
| <i>SMC1</i>    | At3g54670 | GCTCGAAGCTTGAAAAATTC              | CCACGTCCTTTCTATTGGTCTC     | 63  | 96                         |
| <i>SMC6A</i>   | At5g07660 | TGCCTCAAGATGCAACAAAC              | AAAGTCGAGAAAGACCGTTCC      | 150 | 76                         |
| <i>SMC6B</i>   | At5g61460 | TCGCACGAGAGGATAAAGAAA             | TGACTCAAAGCCGAGGATG        | 68  | 106                        |
| <i>TOPII</i>   | At3g23890 | CCTATTCAGCAATGGACACAGA            | TTCTTCTTTGCTCCTTGTCTACC    | 139 | 76                         |
| <i>SMC4A</i>   | At5g48600 | TGAAGGATAAACTGCAAACCAA            | TGATCTCTGTATTGTTTTGTTCGAT  | 131 | 114                        |
| <i>CHR11</i>   | At3g06400 | AGCCAGACTTAAAGAGATGCAGA           | CTCCCTTTTCCCTTATTGTTCA     | 67  | 108                        |
| <i>MET1</i>    | At5g49160 | CAACTGCAATGTGATTCTTAGGG           | GCCTCTGTAGTAGAGACACAATCATC | 39  | 75                         |
| <i>SWI1</i>    | At5g51330 | TTATTGGAGAAACCTTGCGTAAA           | CCACTGTTTTCTTAAGCCATCC     | 69  | 60                         |
| <i>SPO11-1</i> | At3g13170 | TTCCCAAACAGTGTCTTTTGC             | TTCAAGTTCCAACCTCCATTG      | 143 | 113                        |
| <i>ATM</i>     | At3g48190 | AGGGTGGTGAGATGAGAAGC              | TCTGTGTCAATTGCGTCTTGT      | 98  | 67                         |
| <i>ATR</i>     | At5g40820 | TTCAGCGCCCAAAGAAGA                | GGCTTGCAAGGAATGGATA        | 3   | 67                         |
| <i>BRCA1</i>   | At4g21070 | CCAAGAAATTGGTCTTATCTTGC           | AGTTCCGCAAATTCTGCAAT       | 100 | 73                         |
| <i>BRCA2B</i>  | At5g01630 | CACCTTAAAACCCGCAGTG               | AGGTGATTTACAAGCACCGATT     | 140 | 117                        |
| <i>RAD50</i>   | At2g31970 | GCAGTGCAAGTCAAAGGTT               | GGCCATCCAGGTTTGTAG         | 136 | 118                        |
| <i>RAD51C</i>  | At2g45280 | TCAACTAGCGCTTGCTTTAGG             | AATACAGAATGACTCGGTTGGTG    | 54  | 65                         |
| <i>RAD51</i>   | At5g20850 | CATGCCACCACAACAAGG                | ACATGGCGAGCTTATCACTTTAC    | 91  | 78                         |
| <i>DMC1</i>    | At3g22880 | TCAACGTTGCTGTCTACATGACT           | GACCACCTGCTGGCTTTTT        | 31  | 90                         |
| <i>MSH4</i>    | At4g17380 | CAAGAATGGGGACAATGGAT              | TGCATTATGAAAGCGGTCTCT      | 151 | 82                         |
| <i>MLH3</i>    | At4g35520 | GACTGAAGCAGACCTCACTTTG            | GCCTTCAAATCGACAAGAGG       | 47  | 76                         |
| <i>MUS81</i>   | At4g30870 | GATATGTACCCAACGCTTTTGTG           | CTTCTTGCGCCGAGACAT         | 29  | 73                         |
| <i>FANCM</i>   | At1g35530 | GCGGTAAAAAGCACATTAGAGG            | GCTCCCGAAGAGACCTCAG        | 153 | 94                         |

UPL: Universal Probe Library.

### Supplementary References

1. Jacobsen, S. E., Running, M. P. & Meyerowitz, E. M. Disruption of an RNA helicase/RNase III gene in *Arabidopsis* causes unregulated cell division in floral meristems. *Development* **126**, 5231-5243 (1999).
2. Jover-Gil, S., Candela, H. & Ponce, M.R. Plant microRNAs and development. *Int. J. Dev. Biol.* **49**, 733-744 (2005).
3. Vazquez, F., Gascioli, V., Crété, P. & Vaucheret, H. The nuclear dsRNA binding protein HYL1 is required for microRNA accumulation and plant development, but not posttranscriptional transgene silencing. *Curr. Biol.* **14**, 346-351 (2004).
4. Berná, G., Robles, P. & Micol, J.L. A mutational analysis of leaf morphogenesis in *Arabidopsis thaliana*. *Genetics* **152**, 729-742 (1999).
5. Miyashima, S., Hashimoto, T. & Nakajima, K. ARGONAUTE1 acts in *Arabidopsis* root radial pattern formation independently of the SHR/SCR pathway. *Plant Cell Physiol.* **50**, 626-634 (2009).
